# Supplementary material for: What Next After MBSR/MBCT? An Open Trial of an 8-Week Follow-on Program Exploring Mindfulness of Feeling Tone (vedanā)
Source: Springer Nature journal article supplement (doi:10.1007/s12671-022-01929-0), 2022-07-07
Supplement: 12671_2022_1929_MOESM2_ESM.pdf [file 12671_2022_1929_MOESM2_ESM.pdf]

## Supplementary Information 2:

**Table 5**

*Differences Between Those who Provided Complete Data and Those who Completed Only the Pre-Intervention Questions, or Only the Post-Intervention Questions on the Main Outcome Measures*

| Measure            | Sum of squares | <i>df</i> | Mean square | <i>F</i> | <i>p</i> |
|--------------------|----------------|-----------|-------------|----------|----------|
| Pre course PHQ9    | 12.12          | 1         | 12.12       | .67      | .416     |
| Post course PHQ9   | 29.67          | 1         | 29.67       | 3.54     | .064     |
| Pre course GAD7    | 13.55          | 1         | 13.55       | .69      | .409     |
| Post course GAD7   | 6.63           | 1         | 6.63        | .65      | .423     |
| Pre course PSS     | 32.90          | 1         | 32.90       | 1.0      | .321     |
| Post course PSS    | 96.06          | 1         | 96.06       | 3.12     | .082     |
| Pre course WEMWBS  | .61            | 1         | .61         | .07      | .796     |
| Post course WEMWBS | 1.70           | 1         | 1.7         | .18      | .670     |
| Pre course FFMQ    | .38            | 1         | .38         | .00      | .951     |
| Post course FFMQ   | 32.11          | 1         | 32.11       | .51      | .477     |
