# Supplementary material for: What Next After MBSR/MBCT? An Open Trial of an 8-Week Follow-on Program Exploring Mindfulness of Feeling Tone (vedanā)
Source: Springer Nature journal article supplement (doi:10.1007/s12671-022-01929-0), 2022-07-07
Supplement: 12671_2022_1929_MOESM4_ESM.pdf [file 12671_2022_1929_MOESM4_ESM.pdf]

**Supplementary Information 4:**

Differences between novice, intermediate, and advanced mindfulness experience at pre- and post-intervention.

**Table 6**

*Pre-Intervention Differences Between Novice, Intermediate and Advanced Mindfulness Experience Groups*

| Measure | Group                    | N  | Mean  | Std. Deviation | Std. Error | 95% Confidence Interval |             | Minimum | Maximum |
|---------|--------------------------|----|-------|----------------|------------|-------------------------|-------------|---------|---------|
|         |                          |    |       |                |            | for Mean                |             |         |         |
|         |                          |    |       |                |            | Lower Bound             | Upper Bound |         |         |
| FFMQ    | Novice (Under 12 months) | 13 | 50.92 | 8.66           | 2.40       | 45.69                   | 56.15       | 32.00   | 61.00   |
|         | Intermediate (1-5 years) | 32 | 49.94 | 9.09           | 1.61       | 46.66                   | 53.22       | 28.00   | 66.00   |
|         | Advanced (Over 5 years)  | 27 | 57.22 | 10.40          | 2.00       | 53.11                   | 61.34       | 39.00   | 74.00   |
|         | Total                    | 72 | 52.85 | 10.01          | 1.18       | 50.50                   | 55.20       | 28.00   | 74.00   |
| WEMWBS  | Novice (Under 12 months) | 13 | 21.57 | 2.44           | 0.68       | 20.10                   | 23.04       | 16.88   | 26.02   |
|         | Intermediate (1-5 years) | 32 | 21.39 | 2.50           | 0.44       | 20.49                   | 22.29       | 16.88   | 28.13   |
|         | Advanced (Over 5 years)  | 27 | 23.72 | 3.32           | 0.64       | 22.41                   | 25.04       | 18.59   | 35.00   |
|         | Total                    | 72 | 22.30 | 3.00           | 0.35       | 21.59                   | 23.00       | 16.88   | 35.00   |
| PSS     | Novice (Under 12 months) | 13 | 18.31 | 5.85           | 1.62       | 14.77                   | 21.84       | 11.00   | 32.00   |
|         | Intermediate (1-5 years) | 32 | 16.66 | 5.89           | 1.04       | 14.53                   | 18.78       | 5.00    | 30.00   |
|         | Advanced (Over 5 years)  | 27 | 13.96 | 5.03           | 0.97       | 11.97                   | 15.95       | 3.00    | 25.00   |
|         | Total                    | 72 | 15.94 | 5.74           | 0.68       | 14.60                   | 17.29       | 3.00    | 32.00   |
| PHQ-9   | Novice (Under 12 months) | 13 | 5.31  | 4.27           | 1.18       | 2.73                    | 7.89        | 0.00    | 14.00   |
|         | Intermediate (1-5 years) | 32 | 7.00  | 4.52           | 0.80       | 5.37                    | 8.63        | 2.00    | 21.00   |
|         | Advanced (Over 5 years)  | 27 | 5.22  | 3.78           | 0.73       | 3.73                    | 6.72        | 0.00    | 13.00   |

|       |                          |    |      |      |      |      |      |      |       |
|-------|--------------------------|----|------|------|------|------|------|------|-------|
| GAD-7 | Total                    | 72 | 6.03 | 4.24 | 0.50 | 5.03 | 7.02 | 0.00 | 21.00 |
|       | Novice (Under 12 months) | 13 | 5.54 | 4.33 | 1.20 | 2.92 | 8.16 | 0.00 | 13.00 |
|       | Intermediate (1-5 years) | 32 | 6.09 | 4.34 | 0.77 | 4.53 | 7.66 | 1.00 | 21.00 |
|       | Advanced (Over 5 years)  | 27 | 5.70 | 4.69 | 0.90 | 3.85 | 7.56 | 0.00 | 18.00 |
|       | Total                    | 72 | 5.85 | 4.42 | 0.52 | 4.81 | 6.89 | 0.00 | 21.00 |

**Table 7**

*Post-Intervention Differences Between Novice, Intermediate and Advanced Mindfulness Experience Groups*

| Measure | Group                    | N  | Mean  | Std. Deviation | Std. Error | 95% Confidence Interval for Mean |             | Minimum | Maximum |
|---------|--------------------------|----|-------|----------------|------------|----------------------------------|-------------|---------|---------|
|         |                          |    |       |                |            | Lower Bound                      | Upper Bound |         |         |
| WEMWBS  | Novice (Under 12 months) | 8  | 23.12 | 2.77           | 0.98       | 20.80                            | 25.43       | 16.88   | 26.02   |
|         | Intermediate (1-5 years) | 28 | 23.64 | 2.15           | 0.41       | 22.80                            | 24.47       | 18.59   | 28.13   |
|         | Advanced (Over 5 years)  | 23 | 25.02 | 3.44           | 0.72       | 23.53                            | 26.51       | 19.98   | 35.00   |
|         | Total                    | 59 | 24.11 | 2.90           | 0.37       | 23.36                            | 24.85       | 16.88   | 35.00   |
| FFMQ    | Novice (Under 12 months) | 8  | 54.38 | 8.98           | 3.17       | 46.87                            | 61.88       | 39.00   | 67.00   |
|         | Intermediate (1-5 years) | 27 | 54.78 | 6.19           | 1.19       | 52.33                            | 57.23       | 45.00   | 71.00   |
|         | Advanced (Over 5 years)  | 23 | 59.26 | 8.63           | 1.80       | 55.53                            | 62.99       | 44.00   | 72.00   |
|         | Total                    | 58 | 56.50 | 7.82           | 1.00       | 54.44                            | 58.56       | 39.00   | 72.00   |
| PSS     | Novice (Under 12 months) | 8  | 14.63 | 6.91           | 2.44       | 8.85                             | 20.40       | 9.00    | 28.00   |
|         | Intermediate (1-5 years) | 28 | 14.21 | 5.43           | 1.03       | 12.11                            | 16.32       | 6.00    | 27.00   |
|         | Advanced (Over 5 years)  | 23 | 12.26 | 5.87           | 1.22       | 9.72                             | 14.80       | 2.00    | 22.00   |
|         | Total                    | 59 | 13.51 | 5.79           | 0.75       | 12.00                            | 15.02       | 2.00    | 28.00   |

|       |                          |    |      |      |      |      |      |      |       |
|-------|--------------------------|----|------|------|------|------|------|------|-------|
| PHQ-9 | Novice (Under 12 months) | 8  | 3.38 | 2.07 | 0.73 | 1.65 | 5.10 | 2.00 | 8.00  |
|       | Intermediate (1-5 years) | 28 | 4.64 | 2.53 | 0.48 | 3.66 | 5.62 | 1.00 | 11.00 |
|       | Advanced (Over 5 years)  | 23 | 3.04 | 2.96 | 0.62 | 1.76 | 4.32 | 0.00 | 10.00 |
|       | Total                    | 59 | 3.85 | 2.72 | 0.35 | 3.14 | 4.56 | 0.00 | 11.00 |
| GAD-7 | Novice (Under 12 months) | 8  | 3.75 | 3.45 | 1.22 | 0.86 | 6.64 | 0.00 | 9.00  |
|       | Intermediate (1-5 years) | 28 | 4.32 | 3.21 | 0.61 | 3.08 | 5.57 | 0.00 | 16.00 |
|       | Advanced (Over 5 years)  | 23 | 3.39 | 2.87 | 0.60 | 2.15 | 4.63 | 0.00 | 11.00 |
|       | Total                    | 59 | 3.88 | 3.09 | 0.40 | 3.08 | 4.69 | 0.00 | 16.00 |

---
